# Supplementary material for: Metabolomics analyses reveal the liver-protective mechanism of Wang's metabolic formula on metabolic-associated fatty liver disease
Source: PubMed Central journal article supplement — Heliyon. 2024 Jun 22;10(13):e33418. doi: 10.1016/j.heliyon.2024.e33418 (PMC11261804; doi:10.1016/j.heliyon.2024.e33418), 2024-06-22
Supplement: mmc1.pdf [file mmc1.pdf]

**Supplementary Table.1** Body weight change of MAFLD rat (g)

| Group | Week 0        | Week 1        | Week 2        | Week 3        | Week 4        |
|-------|---------------|---------------|---------------|---------------|---------------|
| NC    | 403.8±41.3    | 403.7±32.9    | 425.0±35.3    | 421.0±34.4    | 428.4±33.0    |
| MC    | 552.7±34.1### | 571.4±22.1### | 566.6±49.1### | 562.6±43.4### | 586.0±36.9### |
| WMF-L | 549.9±33.5    | 543.1±30.9    | 559.7±26      | 548.3±26.7    | 558.6±25.3    |
| WMF-M | 530.6±21.2    | 543.7±27.9    | 541.4±21.7    | 538.4±24.0    | 545.5±15.3*   |
| WMF-H | 529.9±32.4    | 522.2±38.3*   | 510.3±27.3*   | 513.3±23.6*   | 522.6±29.9**  |

WMF-L: Low dosage (0.36 g/mL); WMF-M: Mid dosage (0.71 g/mL); WMF-H: High dosage (1.43 g/mL). All the values were presented as the mean ± SD. #*P* < 0.05, ###*P* < 0.01 vs. NC group; \**P* < 0.05, \*\**P* < 0.01 vs. MC group. (n=5)

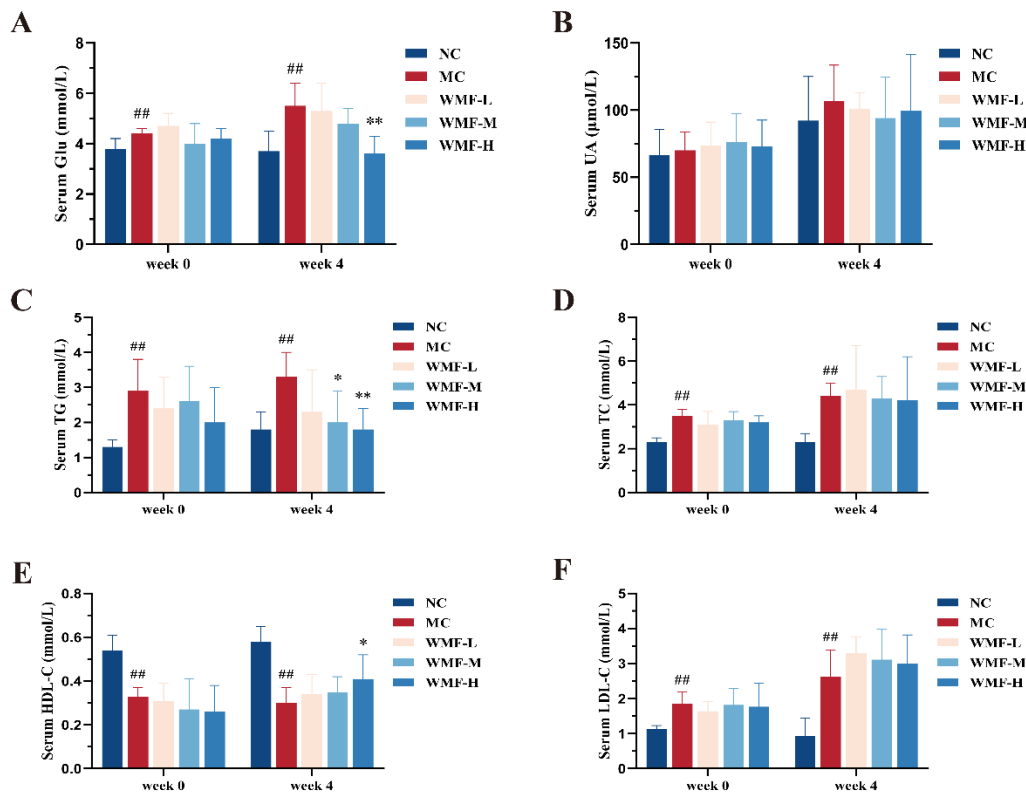

**Supplementary Fig.1** Serum biochemistry change of MAFLD rat. (A-F) The levels of Glu, UA, TG, TC, HDL-c and LDL-c in the serum, respectively. WMF-L: Low dosage (0.36 g/mL); WMF-M: Mid dosage (0.71 g/mL); WMF-H: High dosage (1.43 g/mL). All the values were presented as the mean ± SD. #*P* < 0.05, ###*P* < 0.01 vs. NC group; \**P* < 0.05, \*\**P* < 0.01 vs. MC group. (n=5)

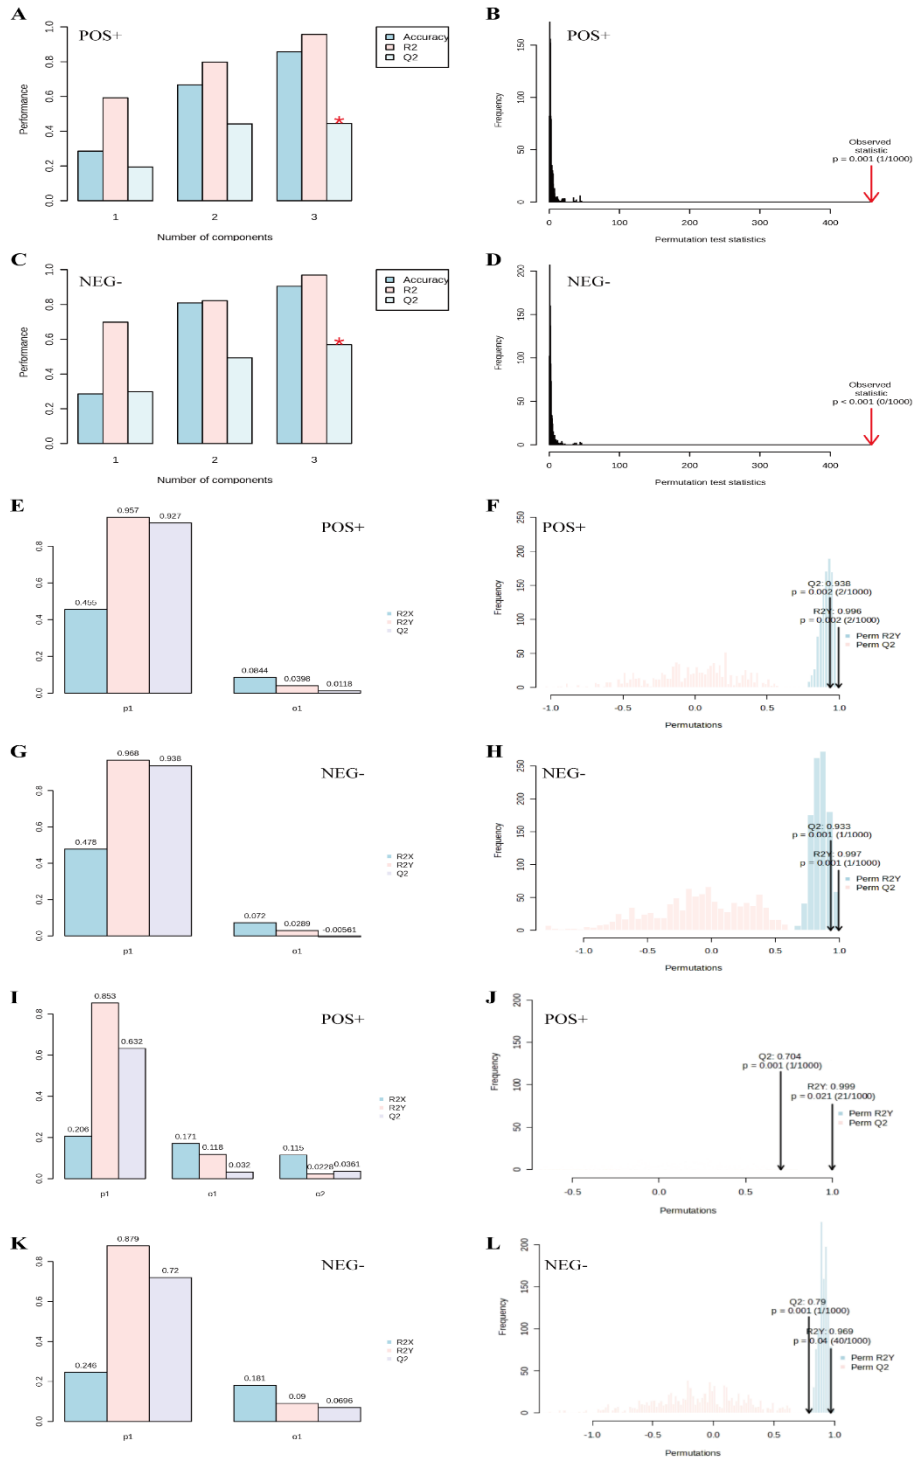

**Supplementary Fig.2** Model tests of PLS-DA and OPLS-DA. (A, C) Cross-validation of PLS-DA score plot. (B, D) Permutation test of PLS-DA score plot. (E, G) Model overview of OPLS-DA score plot between MC group and NC group. (F, H) Permutation test of OPLS-DA score plot between MC group and NC group. (I, K) Model overview of OPLS-DA score plot between MC group and WMF group. (J, L) Permutation test of OPLS-DA score plot mode between MC group and WMF group.

**Supplementary Table 2** The information of annotated metabolites in liver

| No. | RT <sup>1</sup> | Metabolite                                 | <i>m/z</i> | Adducts                   | Mode | HMDB ID     | Change Trend                   |                   |
|-----|-----------------|--------------------------------------------|------------|---------------------------|------|-------------|--------------------------------|-------------------|
|     |                 |                                            |            |                           |      |             | M <sup>2</sup> /N <sup>3</sup> | W <sup>4</sup> /M |
| 1   | 0.790           | 5-Hydroxylysine                            | 204.1340   | M+ACN+H                   | pos  | HMDB0245508 | ↓##                            | ↑*                |
| 2   | 0.971           | Glycerol 3-Phosphate                       | 171.0057   | M-H <sub>2</sub> O-H, M-H | neg  | HMDB0252849 | ↑##                            | ↓*                |
| 3   | 0.995           | (S)C(S)S-S-Methylecysteine sulfoxide       | 132.0117   | M-H <sub>2</sub> O-H      | neg  | HMDB0029432 | ↓#                             | ↑*                |
| 4   | 1.040           | Glycylproline                              | 173.0919   | M+H                       | pos  | HMDB0000721 | ↓##                            | ↑**               |
| 5   | 1.917           | 3-Hydroxybutanoic Acid                     | 103.0391   | M-H                       | neg  | HMDB0000011 | ↑##                            | ↓*                |
| 6   | 2.486           | Hydroxypropyl-Valine                       | 213.1230   | M+H-H <sub>2</sub> O      | pos  | HMDB0028876 | ↓##                            | ↑*                |
| 7   | 2.698           | 5-(delta-Carboxybutyl)homocysteine         | 222.0792   | M+H                       | pos  | HMDB0246764 | ↑##                            | ↓**               |
| 8   | 2.746           | Oxyphencyclimine                           | 367.1968   | M+Na                      | pos  | HMDB0014527 | ↓##                            | ↑*                |
| 9   | 2.794           | Ecgonine Methyl Ester                      | 217.1543   | M+NH <sub>4</sub>         | pos  | HMDB0006406 | ↓##                            | ↑*                |
| 10  | 2.802           | N-(3-Methylbut-2-EN-1-YL)-9H-purin-6-amine | 267.1334   | M+ACN+Na                  | pos  | HMDB0245646 | ↓##                            | ↑*                |
| 11  | 2.802           | Prolyl-Valine                              | 215.1387   | M+H                       | pos  | HMDB0029030 | ↓##                            | ↑*                |
| 12  | 2.817           | 7-Hydroxyoct-3-enedioylcarnitine           | 332.1694   | M+H                       | pos  | HMDB0241714 | ↑##                            | ↓*                |
| 13  | 2.824           | 6-(2-Hydroxyethoxy)-6-oxohexanoylcarnitine | 334.1852   | M+H                       | pos  | HMDB0241809 | ↑##                            | ↓*                |
| 14  | 2.886           | L-Threo-3-Phenylserine                     | 223.1074   | M+ACN+H                   | pos  | HMDB0002184 | ↓##                            | ↑**               |
| 15  | 2.982           | L-Proline, 1-(1-L-leucyl-L-prolyl)-        | 326.2067   | M+H                       | pos  | HMDB0253022 | ↓##                            | ↑**               |
| 16  | 2.990           | Etiracetam                                 | 203.1388   | M+CH <sub>3</sub> OH+H    | pos  | HMDB0015333 | ↓##                            | ↑**               |
| 17  | 3.013           | Glycylleucine                              | 189.1231   | M+H, M+Na                 | pos  | HMDB0028929 | ↓##                            | ↑*                |
| 18  | 3.101           | Val-Gly-Val-Ala-Pro-Gly                    | 521.2707   | M+Na                      | pos  | HMDB0253033 | ↓##                            | ↑*                |
| 19  | 3.125           | Leucylproline                              | 229.1543   | M+H, M+Na                 | pos  | HMDB0011175 | ↓##                            | ↑**               |
| 20  | 3.141           | Methyldopa                                 | 253.1179   | M+ACN+H                   | pos  | HMDB0011754 | ↓##                            | ↑**               |
| 21  | 3.149           | Isoleucyl-Tyrosine                         | 295.1647   | M+H                       | pos  | HMDB0028919 | ↓##                            | ↑*                |
| 22  | 3.204           | Saccharopine                               | 318.1654   | M+ACN+H                   | pos  | HMDB0000279 | ↓##                            | ↑**               |
| 23  | 3.305           | Undeca-5,7,9-trienedioylcarnitine          | 374.1567   | M+Na-2H                   | neg  | HMDB0241204 | ↓##                            | ↑**               |
| 24  | 3.305           | Phenylalanylaspartic acid                  | 279.0985   | M-H                       | neg  | HMDB0028991 | ↓##                            | ↑*                |
| 25  | 3.321           | Valylproline                               | 213.1240   | M-H                       | neg  | HMDB0029135 | ↓##                            | ↑*                |
| 26  | 3.360           | Dodeca-4,6,8-trienedioylcarnitine          | 388.1724   | M+Na-2H                   | neg  | HMDB0241284 | ↓##                            | ↑**               |

| No. | RT <sup>1</sup> | Metabolite                                                                         | <i>m/z</i> | Adducts                | Mode | HMDB ID     | Change Trend                   |                   |
|-----|-----------------|------------------------------------------------------------------------------------|------------|------------------------|------|-------------|--------------------------------|-------------------|
|     |                 |                                                                                    |            |                        |      |             | M <sup>2</sup> /N <sup>3</sup> | W <sup>4</sup> /M |
| 27  | 3.391           | Ala-Leu                                                                            | 201.1239   | M-H                    | neg  | HMDB0028691 | ↓##                            | ↑*                |
| 28  | 3.393           | L-phenylalanyl-L-proline                                                           | 263.1385   | M+H                    | pos  | HMDB0011177 | ↓##                            | ↑**               |
| 29  | 3.407           | Aspartame                                                                          | 293.1142   | M-H                    | neg  | HMDB0001894 | ↓##                            | ↑*                |
| 30  | 3.456           | Tramadol                                                                           | 286.1755   | M+Na                   | pos  | HMDB0259401 | ↓##                            | ↑**               |
| 31  | 3.501           | Glutaminylleucine                                                                  | 258.1458   | M-H                    | neg  | HMDB0028801 | ↓##                            | ↑**               |
| 32  | 3.595           | Leucyl-Valine                                                                      | 229.1554   | M-H                    | neg  | HMDB0028942 | ↓##                            | ↑*                |
| 33  | 3.607           | Capsicoside A1                                                                     | 617.3647   | M+Na                   | pos  | HMDB0303762 | ↓##                            | ↑*                |
| 34  | 3.615           | Salidroside                                                                        | 333.1550   | M+CH <sub>3</sub> OH+H | pos  | HMDB0257463 | ↓##                            | ↑*                |
| 35  | 3.655           | Phenylalanyl-Gamma-glutamate                                                       | 276.1338   | M+H-H <sub>2</sub> O   | pos  | HMDB0029009 | ↓##                            | ↑*                |
| 36  | 3.678           | N(2)-phenylacetyl-L-glutamate                                                      | 306.1443   | M+ACN+H                | pos  | HMDB0062645 | ↓##                            | ↑*                |
| 37  | 3.690           | Delta-Hydroxylysylnorleucine                                                       | 272.1615   | M-H <sub>2</sub> O-H   | neg  | HMDB0253190 | ↓##                            | ↑**               |
| 38  | 3.690           | Benfluorex                                                                         | 332.1253   | M-H <sub>2</sub> O-H   | neg  | HMDB0248949 | ↓##                            | ↑**               |
| 39  | 3.713           | Isoleucylproline                                                                   | 227.1397   | M-H                    | neg  | HMDB0011174 | ↓##                            | ↑*                |
| 40  | 3.729           | Hydroxyzine                                                                        | 373.1726   | M-H                    | neg  | HMDB0014697 | ↓#                             | ↑**               |
| 41  | 3.742           | N-Valylphenylalanine                                                               | 265.1541   | M+H                    | pos  | HMDB0255244 | ↓##                            | ↑**               |
| 42  | 3.745           | Deca-4,6,8-trienedioylcarnitine                                                    | 360.1410   | M+Na-2H                | neg  | HMDB0241130 | ↓#                             | ↑*                |
| 43  | 3.768           | Adipic Acid                                                                        | 145.0498   | M-H                    | neg  | HMDB0000448 | ↑##                            | ↓**               |
| 44  | 3.781           | Dithizone                                                                          | 274.1102   | M+NH <sub>4</sub>      | pos  | HMDB0251496 | ↑##                            | ↓**               |
| 45  | 3.807           | Ala-phe                                                                            | 235.1085   | M-H                    | neg  | HMDB0028694 | ↓##                            | ↑*                |
| 46  | 3.845           | Heliotridine                                                                       | 328.2223   | 2M+NH <sub>4</sub>     | pos  | HMDB0253071 | ↓##                            | ↑**               |
| 47  | 3.862           | 6-(2-Hydroxyethoxy)-6-oxohexanoic acid                                             | 189.0762   | M-H                    | neg  | HMDB0061681 | ↑##                            | ↓**               |
| 48  | 3.862           | N-(N-(3-Amino-3-carboxypropyl)-3-amino-3-carboxypropyl)azetidine-2-carboxylic acid | 284.1250   | M-H <sub>2</sub> O-H   | neg  | HMDB0255025 | ↓#                             | ↑**               |
| 49  | 3.917           | Metoprolol                                                                         | 288.1564   | M+Na-2H                | neg  | HMDB0001932 | ↓##                            | ↑**               |
| 50  | 4.060           | N-Jasmonoylisoleucine                                                              | 346.1965   | M+Na                   | pos  | HMDB0029391 | ↓##                            | ↑*                |
| 51  | 4.389           | DL-Allylglycine                                                                    | 344.1824   | 3M-H                   | neg  | HMDB0251510 | ↓##                            | ↑**               |
| 52  | 4.393           | Pumiliotoxin A                                                                     | 330.2380   | M+Na                   | pos  | HMDB0256924 | ↓##                            | ↑*                |
| 53  | 4.640           | Hordatine A                                                                        | 587.2682   | M+Na-2H                | neg  | HMDB0030461 | ↓#                             | ↑*                |

| No. | RT <sup>1</sup> | Metabolite                             | m/z      | Adducts                                       | Mode | HMDB ID     | Change Trend                   |                   |
|-----|-----------------|----------------------------------------|----------|-----------------------------------------------|------|-------------|--------------------------------|-------------------|
|     |                 |                                        |          |                                               |      |             | M <sup>2</sup> /N <sup>3</sup> | W <sup>4</sup> /M |
| 54  | 4.718           | 5-Acetamidovalerate                    | 360.2120 | 2M+ACN+H                                      | pos  | HMDB0012175 | ↓##                            | ↑*                |
| 55  | 4.844           | Leucylphenylalanine                    | 277.1555 | M-H                                           | neg  | HMDB0302841 | ↓##                            | ↑**               |
| 56  | 4.955           | Valerylglycine                         | 360.2121 | M+ACN+H,<br>2M+ACN+H                          | pos  | HMDB0000927 | ↓##                            | ↑**               |
| 57  | 5.066           | Val-pro-pro                            | 640.4015 | 2M+NH <sub>4</sub>                            | pos  | HMDB0253034 | ↓##                            | ↑**               |
| 58  | 5.559           | Acetophenazine                         | 392.1826 | M-H <sub>2</sub> O-H                          | neg  | HMDB0015196 | ↓#                             | ↑**               |
| 59  | 5.613           | Isopetasoside                          | 379.2106 | M+H-H <sub>2</sub> O                          | pos  | HMDB0029622 | ↑##                            | ↓**               |
| 60  | 5.879           | 3-ethylphenyl Sulfate                  | 201.0221 | M-H                                           | neg  | HMDB0062721 | ↓#                             | ↑**               |
| 61  | 6.049           | Curdione                               | 219.1741 | M+H-H <sub>2</sub> O                          | pos  | HMDB0034714 | ↓##                            | ↑*                |
| 62  | 6.248           | 24-Epibrassinolide                     | 501.3223 | M+Na-2H                                       | neg  | HMDB0034081 | ↓##                            | ↑*                |
| 63  | 6.295           | Hernandulcin                           | 281.1757 | M+FA-H                                        | neg  | HMDB0037906 | ↑##                            | ↓*                |
| 64  | 6.311           | 19(S)-HETE                             | 303.2312 | M+H-H <sub>2</sub> O                          | pos  | HMDB0011136 | ↓##                            | ↑*                |
| 65  | 6.334           | 9,10-DiHOME                            | 313.2383 | M-H, M+Cl                                     | neg  | HMDB0004704 | ↑##                            | ↓**               |
| 66  | 6.334           | Alpha-Bisabolol oxide B                | 283.1913 | M+FA-H                                        | neg  | HMDB0038197 | ↑##                            | ↓*                |
| 67  | 6.375           | N-Linoleoyl Leucine                    | 426.3568 | M+NH <sub>4</sub> ,<br>M+CH <sub>3</sub> OH+H | pos  | HMDB0241979 | ↑##                            | ↓**               |
| 68  | 6.396           | 3a,7b,12a-Trihydroxy-5a-Cholanoic acid | 389.2696 | M-H <sub>2</sub> O-H                          | neg  | HMDB0000432 | ↑##                            | ↓*                |
| 69  | 6.671           | 9-Hydroxy-10,12-Octadecadienoic Acid   | 277.2171 | M-H <sub>2</sub> O-H                          | neg  | HMDB0062652 | ↑##                            | ↓**               |
| 70  | 6.710           | Immepip                                | 375.2520 | 2M+FA-H                                       | neg  | HMDB0253436 | ↓##                            | ↑**               |
| 71  | 6.820           | N-Oleoyl Leucine                       | 394.3324 | M-H                                           | neg  | HMDB0241962 | ↑##                            | ↓**               |
| 72  | 6.913           | Retinol                                | 269.2258 | M+H-H <sub>2</sub> O,<br>M+H                  | pos  | HMDB0006221 | ↓##                            | ↑*                |
| 73  | 6.945           | Linoleylanilide                        | 400.2854 | M+FA-H                                        | neg  | HMDB0254103 | ↑#                             | ↓**               |
| 74  | 6.993           | LysoPC(P-18:1(9Z)/0:0)                 | 538.3858 | M+CH <sub>3</sub> OH+H                        | pos  | HMDB0010408 | ↑##                            | ↓**               |
| 75  | 7.008           | Primaquine                             | 560.3677 | 2M+ACN+H                                      | pos  | HMDB0015219 | ↑##                            | ↓**               |
| 76  | 7.016           | 3-Icosa-5,8,11-trienoylcarnitine       | 430.3308 | M+H-2H <sub>2</sub> O                         | pos  | HMDB0241586 | ↑##                            | ↓*                |
| 77  | 7.048           | Polypropylene                          | 396.3466 | M+ACN+H                                       | pos  | HMDB0255988 | ↑##                            | ↓**               |
| 78  | 7.119           | LysoPA(20:4(8Z,11Z,14Z,17Z)/0:0)       | 459.2470 | M+H, M+NH <sub>4</sub>                        | pos  | HMDB0114742 | ↑##                            | ↓**               |

Note: <sup>1</sup>Retention time. <sup>2</sup>MC group. <sup>3</sup>NC group. <sup>4</sup>WMF group. ↑Upregulate significantly. ↓Downregulate significantly. #*P* < 0.05, ##*P* < 0.01 vs. NC group; \**P* < 0.05, \*\**P* < 0.01 vs. MC group.

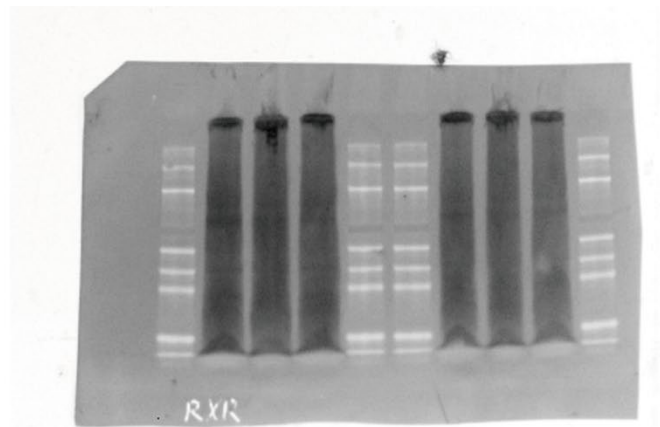

**Total Protein**

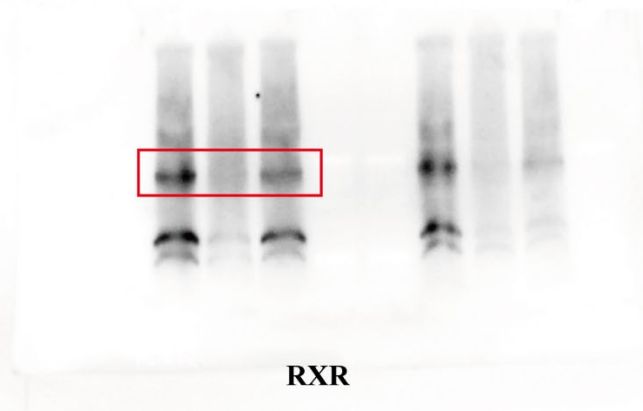

**RXR**

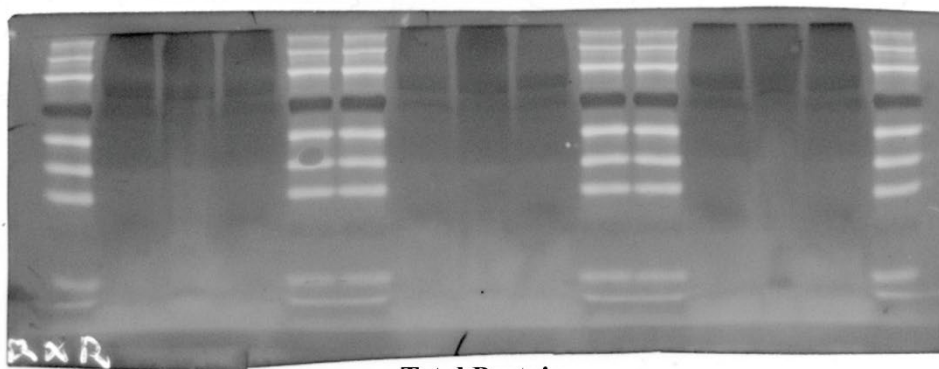

**Total Protein**

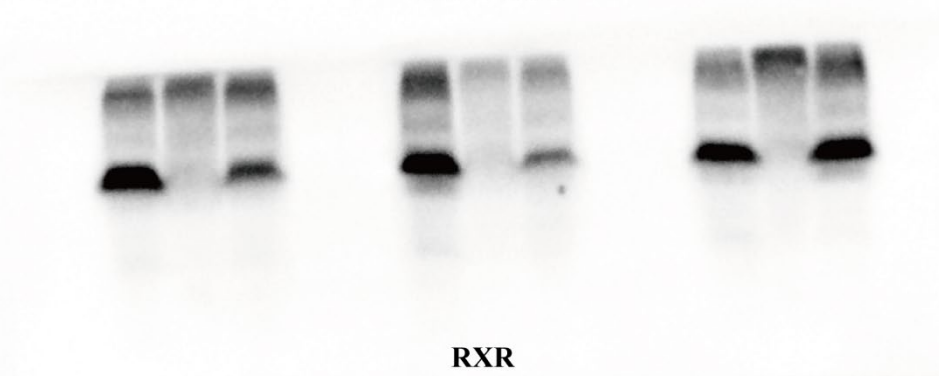

**RXR**

**Supplementary Fig.3** Full, non-adjusted images of RXR western blot. Red rectangle = image displayed in manuscript file.

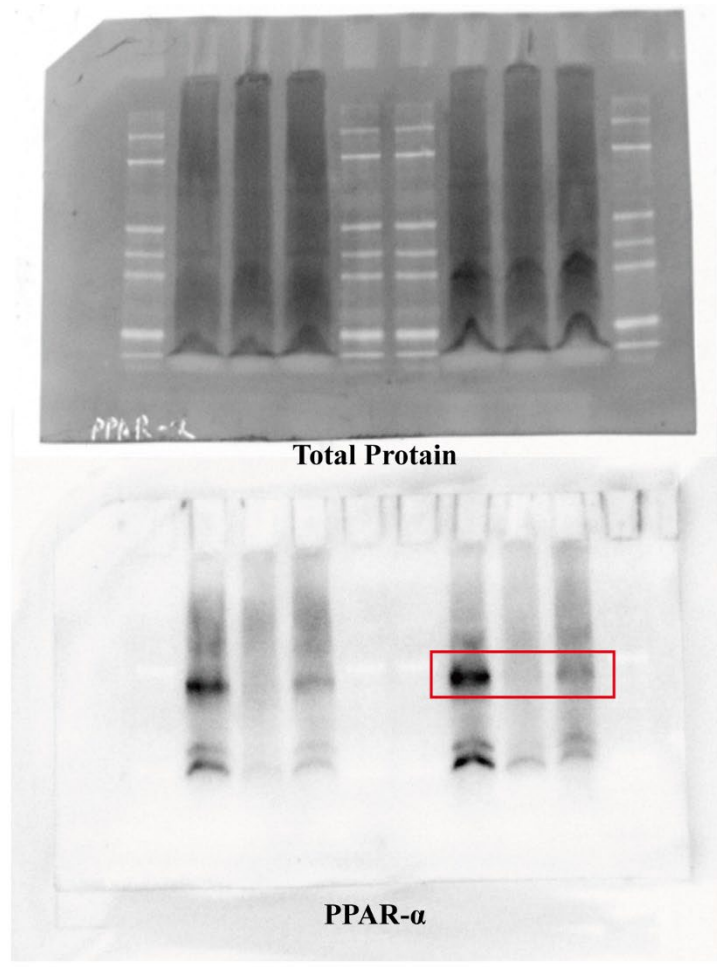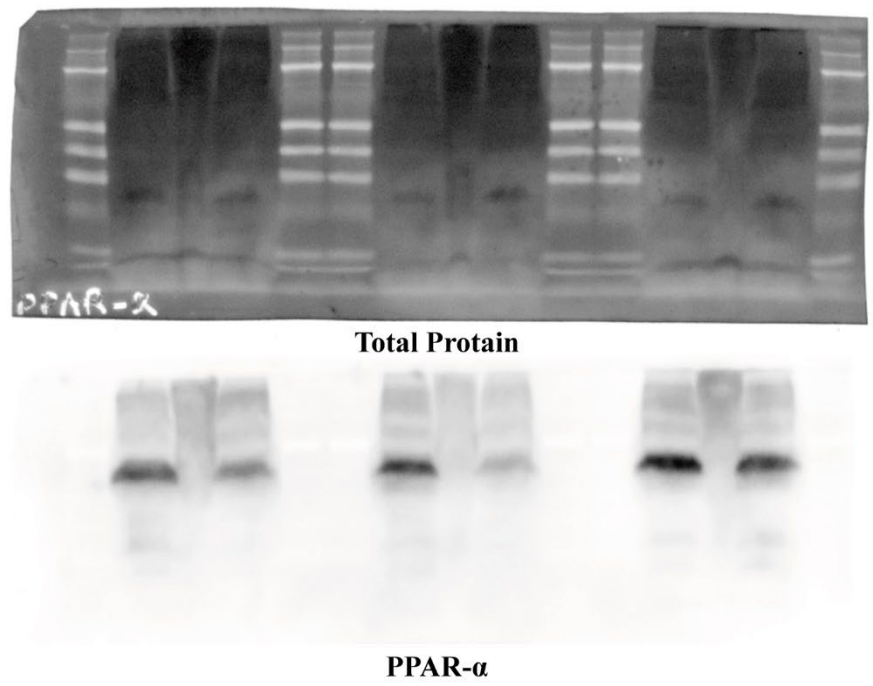

**Supplementary Fig.4** Full, non-adjusted images of PPAR- $\alpha$  western blot. Red rectangle = image displayed in manuscript file.

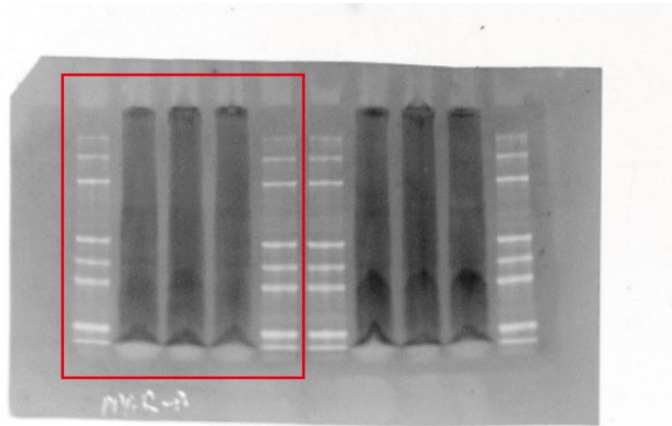

**Total Protein**

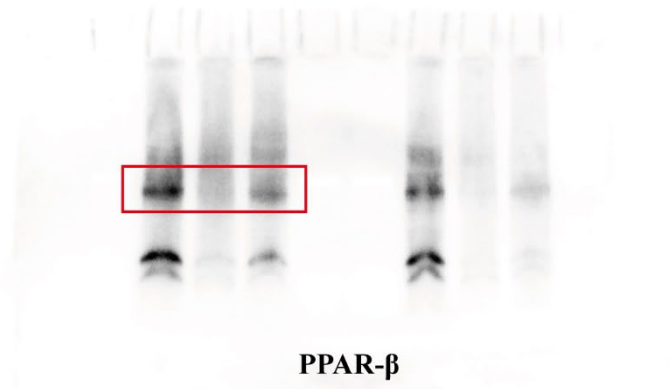

**PPAR-β**

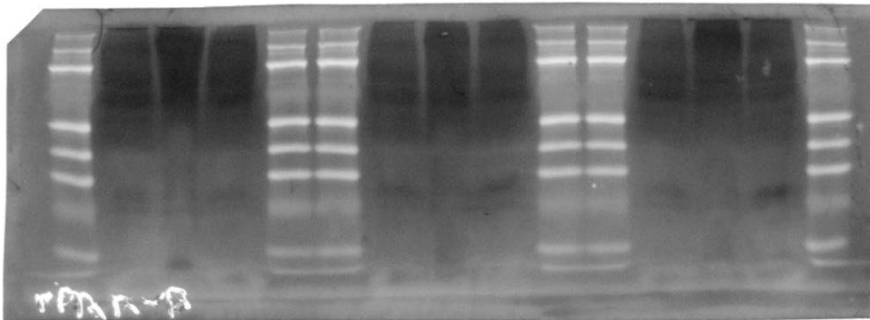

**Total Protein**

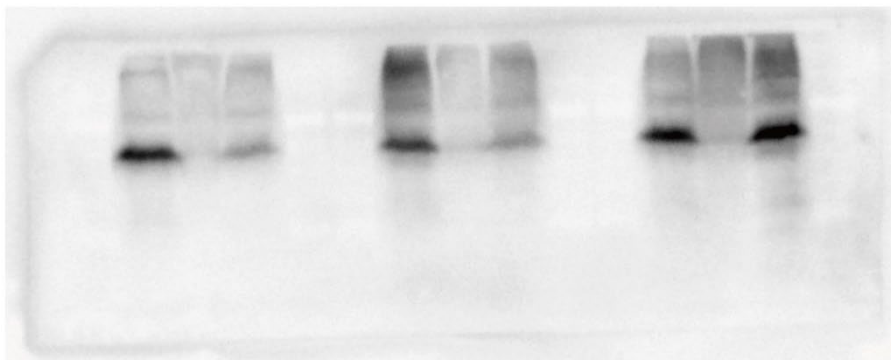

**PPAR-β**

**Supplementary Fig.5** Full, non-adjusted images of PPAR- $\beta$  western blot. Red rectangle = image displayed in manuscript file.



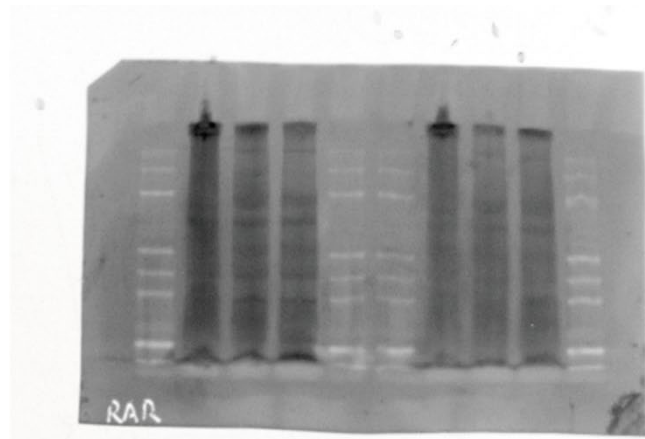

**Total Protein**

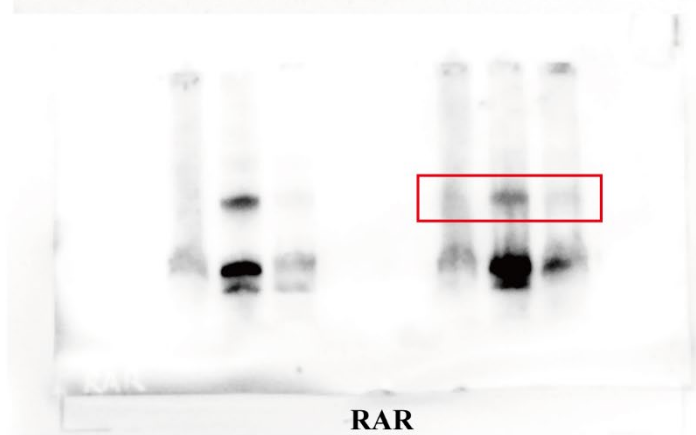

**RAR**

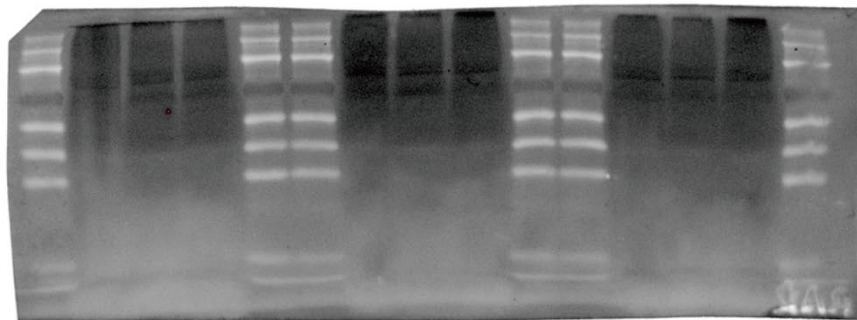

**Total Protein**

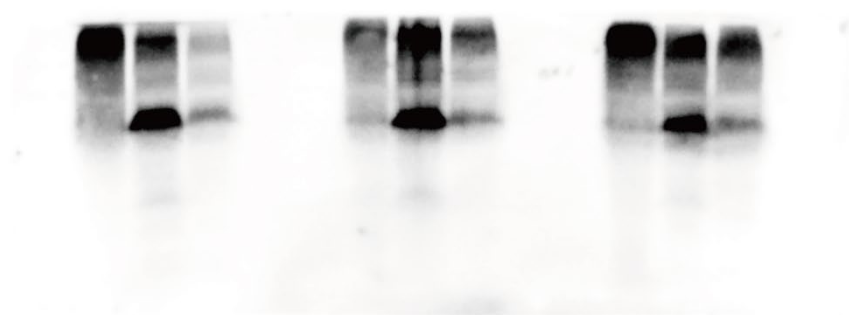

**RAR**

**Supplementary Fig.6** Full, non-adjusted images of RAR western blot. Red rectangle = image displayed in manuscript file.
